# Supplementary material for: Effects of chronic exposure to thiamethoxam on larvae of the hoverfly Eristalis tenax (Diptera, Syrphidae)
Source: PeerJ. 2018 Jan 17;6:e4258. doi: 10.7717/peerj.4258 (PMC5775755; doi:10.7717/peerj.4258)
Supplement: Supplemental Information 3 [file peerj-06-4258-s003.xlsx]

## Sheet: Sheet1
RepID	exp_round	treatment	daysinexp	timetopup	dead
1	1	0	12	12	0
2	1	0	12	12	0
3	1	0	12	12	0
4	1	0	13	13	0
5	1	0	13	13	0
6	1	0	12	12	0
7	1	0	12	12	0
8	2	0	12	12	0
9	2	0	9	0	1
10	2	0	12	12	0
11	2	0	12	12	0
12	2	0	12	12	0
13	2	0	12	12	0
14	2	0	12	12	0
15	2	0	12	12	0
16	2	0	12	12	0
17	2	0	12	12	0
18	3	0	9	9	0
19	3	0	12	0	1
20	3	0	9	9	0
21	3	0	12	12	0
22	3	0	9	9	0
23	3	0	9	9	0
24	3	0	9	9	0
25	3	0	9	9	0
26	3	0	9	9	0
27	3	0	9	9	0
28	4	0	12	12	0
29	4	0	13	0	1
30	4	0	12	12	0
31	4	0	13	0	1
32	4	0	12	12	0
33	4	0	12	12	0
34	4	0	12	12	0
35	4	0	13	0	1
36	4	0	6	0	1
37	1	5	3	0	1
38	1	5	12	12	0
39	1	5	3	0	1
40	1	5	12	12	0
41	1	5	12	0	1
42	1	5	12	0	1
43	1	5	12	12	0
44	1	5	13	13	0
45	2	5	12	12	0
46	2	5	12	12	0
47	2	5	12	12	0
48	2	5	12	12	0
49	2	5	9	0	1
50	2	5	9	0	1
51	2	5	12	12	0
52	2	5	12	12	0
53	2	5	12	12	0
54	3	5	9	9	0
55	3	5	12	12	0
56	3	5	9	9	0
57	3	5	12	12	0
58	3	5	12	12	0
59	3	5	9	9	0
60	3	5	9	9	0
61	3	5	6	0	1
62	3	5	12	12	0
63	3	5	12	12	0
64	4	5	12	12	0
65	4	5	12	12	0
66	4	5	13	0	1
67	4	5	12	12	0
68	4	5	12	12	0
69	4	5	13	0	1
70	4	5	12	12	0
71	4	5	12	12	0
72	4	5	12	12	0
73	1	15	12	12	0
74	1	15	12	12	0
75	1	15	12	12	0
76	1	15	12	0	1
77	1	15	12	12	0
78	1	15	3	0	1
79	1	15	12	12	0
80	1	15	12	12	0
81	1	15	13	0	1
82	2	15	12	12	0
83	2	15	12	12	0
84	2	15	12	12	0
85	2	15	9	0	1
86	2	15	12	12	0
87	2	15	12	12	0
88	2	15	9	9	0
89	2	15	9	0	1
90	2	15	12	12	0
91	3	15	12	12	0
92	3	15	9	9	1
93	3	15	9	9	0
94	3	15	9	0	1
95	3	15	9	0	1
96	3	15	9	9	0
97	3	15	9	9	0
98	4	15	13	0	1
99	4	15	12	12	0
100	4	15	12	12	0
101	4	15	13	0	1
102	4	15	12	12	0
103	4	15	13	0	1
104	4	15	13	0	1
105	4	15	12	12	0
106	1	50	12	12	0
107	1	50	3	0	1
108	1	50	12	12	0
109	1	50	12	12	0
110	1	50	12	12	0
111	1	50	12	12	0
112	1	50	12	12	0
113	1	50	12	12	0
114	1	50	12	12	0
115	2	50	12	12	0
116	2	50	1	12	0
117	2	50	12	12	0
118	2	50	12	12	0
119	2	50	12	12	0
120	2	50	1	0	1
121	2	50	12	12	0
122	2	50	9	0	1
123	2	50	12	12	0
124	2	50	12	12	0
125	3	50	9	9	0
126	3	50	9	9	0
127	3	50	9	9	0
128	3	50	9	9	0
129	3	50	9	9	0
130	3	50	12	0	1
131	3	50	12	12	0
132	4	50	12	12	0
133	4	50	12	0	1
134	4	50	12	12	0
135	4	50	12	0	1
136	4	50	9	0	1
137	4	50	12	12	0
138	4	50	12	12	0
139	4	50	13	0	1
140	4	50	12	12	0
141	1	100	12	12	0
142	1	100	12	12	0
143	1	100	12	12	0
144	1	100	3	0	1
145	1	100	12	12	0
146	1	100	12	12	0
147	1	100	12	12	0
148	2	100	12	12	0
149	2	100	12	12	0
150	2	100	12	12	0
151	2	100	12	12	0
152	2	100	9	0	1
153	2	100	12	12	0
154	2	100	9	0	1
155	2	100	9	0	1
156	2	100	12	12	0
157	2	100	12	12	0
158	3	100	12	0	1
159	3	100	9	9	0
160	3	100	9	9	0
161	3	100	9	9	0
162	3	100	9	9	0
163	3	100	12	12	0
164	3	100	9	9	0
165	3	100	9	9	0
166	3	100	9	9	0
167	3	100	9	9	0
168	4	100	13	0	1
169	4	100	12	12	0
170	4	100	12	12	0
171	4	100	9	0	1
172	4	100	13	0	1
173	4	100	12	12	0
174	4	100	12	12	0
175	4	100	12	12	0
176	1	500	3	0	1
177	1	500	3	0	1
178	1	500	3	0	1
179	1	500	3	0	1
180	1	500	3	0	1
181	1	500	3	0	1
182	1	500	3	0	1
183	1	500	3	0	1
184	2	500	1	0	1
185	2	500	9	0	1
186	2	500	1	0	1
187	2	500	9	0	1
188	2	500	1	0	1
189	2	500	12	12	0
190	2	500	1	0	1
191	2	500	9	0	1
192	2	500	9	0	1
193	2	500	12	12	0
194	3	500	12	12	0
195	3	500	3	0	1
196	3	500	12	0	1
197	3	500	3	0	1
198	3	500	3	0	1
199	3	500	3	0	1
200	3	500	3	0	1
201	3	500	12	0	1
202	3	500	3	0	1
203	3	500	3	0	1
204	4	500	12	12	0
205	4	500	12	12	0
206	4	500	3	0	1
207	4	500	6	0	1
208	4	500	3	0	1
209	4	500	3	0	1
210	4	500	6	0	1
211	4	500	3	0	1
212	4	500	3	0	1
213	4	500	3	0	1
