# Supplementary material for: Effects of chronic exposure to thiamethoxam on larvae of the hoverfly Eristalis tenax (Diptera, Syrphidae)
Source: PeerJ. 2018 Jan 17;6:e4258. doi: 10.7717/peerj.4258 (PMC5775755; doi:10.7717/peerj.4258)
Supplement: Supplemental Information 4 — Each line represents one individual and the behaviours recorded in a 10 minute period: (S) stationary, (GR) grooming, (W) walking, (F) flying, (PR) probing through the cage netting with their proboscis, (N) feeding on nectar, pollen or water (grouped together as feeding) and (M) moving which involved remaining stationary whilst making small jerking motions of their body. [file peerj-06-4258-s004.xlsx]

## Sheet: Sheet1
exp_round	sample	treatment	sex	S	GR	W	F	PR	N	M
1	SAMPLE4	0	F	3	41	414	142				600
1	SAMPLE6	0	F		8	408	184				600
1	SAMPLE17	0	M	116	306	98	80				600
1	SAMPLE22	0	F	5	60	425	110				600
1	SAMPLE24	0	M	13	136	340	91		20		600
1	SAMPLE29	0	M	278	322						600
2	SAMPLE2	0	F	18	46	473	63				600
2	SAMPLE3	0	M	222	249	105	15		9		600
2	SAMPLE5	0	M	214		23	363				600
2	SAMPLE11	0	F	27	26	487	60				600
2	SAMPLE17	0	F	406	65	88	34	7			600
2	SAMPLE18	0	F	401	199						600
2	SAMPLE21	0	F		103	376	121				600
2	SAMPLE25	0	F	152		229	219				600
2	SAMPLE26	0	F	5	196	158	194	47			600
3	SAMPLE7	0	M	175	116	173	95	41			600
3	SAMPLE9	0	F		372	38	26	15	149		600
3	SAMPLE10	0	F		206	388		6			600
3	SAMPLE15	0	M	95	270	11	25		189		590
3	SAMPLE20	0	M	304	143	134	19				600
3	SAMPLE23	0	F	361	48	145	46				600
3	SAMPLE27	0	F	600							600
3	SAMPLE30	0	F	13					587		600
4	SAMPLE3	0	M	489	111						600
4	SAMPLE8	0	M						600		600
4	SAMPLE16	0	F	12	18	271	269		30		600
4	SAMPLE21	0	F		29	548	14	9			600
4	SAMPLE23	0	M	357	191	15	32	5			600
1	SAMPLE2	5	F	31	60	102	2	405			600
1	SAMPLE3	5	F	99	445	51	5				600
1	SAMPLE9	5	F	445	14	64	35			42	600
1	SAMPLE25	5	F	3	38	446	113				600
2	SAMPLE1	5	M	5		439	156				600
2	SAMPLE12	5	M	183	258	24	110			25	600
3	SAMPLE2	5	F	361	218		14	7			600
3	SAMPLE3	5	M	317	226	57					600
3	SAMPLE4	5	F	600							600
3	SAMPLE11	5	F	289	222	24	6		59		600
3	SAMPLE16	5	M	19	49	466	66				600
3	SAMPLE19	5	M	25	66	453	56				600
3	SAMPLE28	5	F	440	160						600
3	SAMPLE31	5	M						600		600
3	SAMPLE32	5	F	18	162		150		270		600
3	SAMPLE33	5	M						600		600
4	SAMPLE2	5	F	43	23	183	113		238		600
4	SAMPLE5	5	F	600							600
4	SAMPLE11	5	M	335	222	5	26	12			600
4	SAMPLE13	5	F	98		310	138		54		600
4	SAMPLE17	5	F	291		112	197				600
4	SAMPLE22	5	F	56		238	92	202	12		600
4	SAMPLE28	5	M	76	159	280	85				600
1	SAMPLE12	15	F	567	9	24					600
1	SAMPLE18	15	F	470	130						600
1	SAMPLE23	15	F	52	10	500	38				600
1	SAMPLE26	15	F	194	75			171	160		600
2	SAMPLE4	15	M	508	92						600
2	SAMPLE8	15	F	247	157	115	66			15	600
2	SAMPLE14	15	F	89	167	90	254				600
2	SAMPLE16	15	F	145	28	93	324			10	600
2	SAMPLE20	15	M	414	68	63	55				600
3	SAMPLE13	15	F	90	10	9	127		364		600
3	SAMPLE21	15	M	249	310		41				600
3	SAMPLE29	15	M	147	231	168	42			12	600
4	SAMPLE9	15	F	416	95	63	16	10			600
4	SAMPLE10	15	F	35		336	229				600
4	SAMPLE14	15	F	43	16	368	173				600
1	SAMPLE5	50	F	163	154	277	2			4	600
1	SAMPLE8	50	M	138	98	207	157				600
1	SAMPLE10	50	M	247	20	130	203				600
1	SAMPLE11	50	F	27	182	375	16				600
1	SAMPLE14	50	F	412	68	65	22			33	600
1	SAMPLE16	50	F	412	68	65	22			33	600
1	SAMPLE20	50	F	285	270	45	0				600
1	SAMPLE21	50	F	41	101	414	44				600
1	SAMPLE28	50	F	79	131	302	68			20	600
2	SAMPLE6	50	M	38	302	40	195			25	600
2	SAMPLE7	50	M	229	52	222	41	56			600
2	SAMPLE9	50	F	77	134	114	275				600
2	SAMPLE10	50	M	21	123	215	208	33			600
2	SAMPLE15	50	F	25	27	424	99	25			600
2	SAMPLE23	50	F	51	36	68	421	24			600
2	SAMPLE24	50	F	23	9	403	161	4			600
2	SAMPLE27	50	F		203	291	101	5			600
3	SAMPLE12	50	M		65	15	12		508		600
3	SAMPLE18	50	F	531	69						600
3	SAMPLE22	50	M	18	120	64	11		387		600
3	SAMPLE25	50	M	324	263	7	6				600
4	SAMPLE15	50	F	87	143	266	104				600
4	SAMPLE19	50	F	360	150	80	10				600
4	SAMPLE20	50	M	296	250	34	20				600
4	SAMPLE26	50	M	119	95	278	53	55			600
4	SAMPLE27	50	F						600		600
1	SAMPLE1	100	F	375	63	158	4				600
1	SAMPLE7	100	F		600						600
1	SAMPLE13	100	F	253	87	70	190				600
1	SAMPLE15	100	F	285	87	70	158				600
1	SAMPLE19	100	M	512	88						600
1	SAMPLE27	100	M	490	58	39	13				600
2	SAMPLE13	100	M	7	48	392	153				600
2	SAMPLE19	100	M	33	26	219	315		7		600
2	SAMPLE22	100	F	105	65	97	333				600
2	SAMPLE28	100	M	57	56	242	199		46		600
3	SAMPLE1	100	F	128	423		21			28	600
3	SAMPLE5	100	M	200	390					10	600
3	SAMPLE6	100	F		164	147	22	267			600
3	SAMPLE14	100	M	37	49	316	192		1		595
3	SAMPLE17	100	M	548	52						600
3	SAMPLE24	100	M	509	91						600
3	SAMPLE34	100	M		187	5	11		397		600
4	SAMPLE1	100	F	107	174	62	142			115	600
4	SAMPLE4	100	F	58	352	87	99		4		600
4	SAMPLE7	100	F	112		341	127	20			600
4	SAMPLE12	100	F	42		482	76				600
4	SAMPLE24	100	M	40	77	375	108				600
4	SAMPLE6	500	F	22		45	280		253		600
4	SAMPLE18	500	M	537		36	27				600
4	SAMPLE25	500	M						600		600
